# Supplementary material for: Global tropospheric halogen (Cl, Br, I) chemistry and its impact on oxidants
Source: Copernicus journal article supplement (doi:10.5194/acp-2021-441), 2021-06-02
Supplement: Supplementary file [file acp-2021-441-RC2-supplement.pdf]

# Review of “Global tropospheric halogen (Cl, Br, I) chemistry and its impact on oxidants” by Wang *et al.*

## General comment:

Wang *et al.* presented a description on tropospheric halogens (chlorine, bromine, and iodine) chemistry of an updated global chemical-transport model, GEOS-Chem, and assessed the effects of halogens on tropospheric oxidants and air pollutants. The paper has the potential to contribute to the increasingly recognized role of halogen chemistry in the troposphere. The topic of the manuscript also fits the scope of *Atmospheric Chemistry and Physics*. However, there are major concerns that should be addressed before it can be accepted for publication.

The biggest issue is the omission of anthropogenic (continental) source of reactive chlorine in the model, while there have been dozens of observations in the last decade suggested otherwise. Thornton *et al.* (2010) reported elevated levels of ClNO<sub>2</sub> at a continental site (~1400 km from the nearest coastline) in the U.S. Lee *et al.* (2018) observed high level of reactive chlorine species (HCl, Cl<sub>2</sub>, ClNO<sub>2</sub>, etc.) in the exhaust of coal-fired power plants in the U.S. Wang *et al.* (2016), Tham *et al.* (2016), Zhou *et al.* (2018), Yun *et al.* (2018), Peng *et al.* (2020), and many other recent studies in China consistently presented very high levels of ClNO<sub>2</sub> and other reactive chlorine species and almost all of these studies pointed to the anthropogenic source of chlorine. A recent report by Gunthe *et al.* (2021) suggests the existence of high loading of chloride in India.

The omission of anthropogenic chlorine resulted in many conclusions in the current manuscript that are not in line with previous observations, emission inventories, and model estimates which require further elaboration and/or adjustment.

(1) Line 66, a few emission inventories of anthropogenic have been proposed for China, including Liu *et al.* (2018), Fu *et al.* (2018), and Qiu *et al.* (2019). The anthropogenic chlorine in China alone could be up to ~0.5 Tg Cl a<sup>-1</sup>, similar to the global biomass burning chlorine used here, so it's not “negligible”. It's noteworthy that anthropogenic chlorine emission (mostly in the form of HCl, chloride) will be rapidly activated by anthropogenic NO<sub>x</sub> and form reactive chlorine, e.g., ClNO<sub>2</sub>, while in the vast open ocean, the HCl from the acid displacement mostly reacts with OH to release Cl atom with a slow rate.

(2) Line 174-175, “Cl atom concentrations are usually highest along polluted coastlines”, while including anthropogenic chlorine source might lead to a different answer. In fact, a few modeling studies, including one by the same authors as the current paper, have shown that anthropogenic chlorine leads to much higher levels of chlorine species over continental area than those along the coast, e.g., Hossaini *et al.* (2016), Li *et al.* (2016), Li *et al.* (2020), Wang *et al.* (2020), etc.

(3) Line 245, it appears that the authors did not consider the continental observations of HCl (e.g., the ones in Fig 7 in Hossaini *et al.*, 2016) when conducting the model

performance evaluation. Based on Fig. 2 of the paper, I would expect that the simulated HCl over land would be much lower than the corresponding observations.

(4) Line 250, the same for ClNO<sub>2</sub>. the authors only picked the observations at island and coastal environments, while the vast available measurements in China were not mentioned. An earlier version of GEOS-Chem with very similar chlorine source and chemistry setup (Table 5 in Wang et al., 2019), however, only simulated ~10% of the observed level in southern China.

(5) Line 257, this paragraph is particularly puzzling to me. Lee et al. (2018) specifically pointed out that the reactive chlorine species observed during the WINTER campaign are tied to the power plant plumes. However, the authors claimed that “modeled HCl is lower than the observations but mostly within the calibration uncertainty”, while the current GEOS-Chem model did not include any power plant source of chlorine. Does it mean that the natural sources of chlorine used here is too efficient?

(6) Line 289, the co-existence of anthropogenic chlorine and VOCs emission means that the role of chlorine atom in VOCs oxidation would be more important than what is reported here.

(7) Line 303, “surface NO<sub>x</sub> increases over the continents and this is due to ClNO<sub>2</sub> chemistry”. If ClNO<sub>2</sub> chemistry is an important factor, a full representation of its formation process (including the source of chloride) is then desired.

### **Specific comment:**

1. Line 70-74, define ‘long-lived’ and ‘short-lived’. I wonder why ‘CH<sub>2</sub>Cl<sub>2</sub>’ and ‘CHCl<sub>3</sub>’ are listed as long-lived species when they have a lifetime ~100 days. Is ‘CH<sub>2</sub>Cl’ a typo? Also, ‘CHBr<sub>3</sub>’ has a lifetime of ~20 days, ‘CH<sub>2</sub>Br<sub>2</sub>’ ~130 days, and ‘CH<sub>3</sub>Br’ ~ 2 years.
2. Reaction (1) to (4) and Line 120. What are the numbers used here?
3. Line 128, What was the original value?
4. Line 154, what is the simulation period? 2015 to 2016 with the first year discarded as spin-up? Please specify.
5. Line 167, how was ‘6.3’ calculated? Also, the sum of 6.3 Tg (heterogeneous source) and 46 Tg (acid displacement) is different from 50 Tg (in line 76).
6. Line 179, what are the numbers in Sherwen et al. (2016b) and Zhu et al. (2019)?
7. Line 188 “HOBr is now more likely to react with S(IV)” is not consistent with line 190 “59% of HOBr heterogeneous reactions are with Br<sup>-</sup> and Cl<sup>-</sup>, and 41% are with S(IV)”.
8. Line 195, It would be more informative if the distributions of SSA (both horizontal and vertical) are presented.

9. Please unify the ozone lifetime change in line 298 ('10%') and line 312 ('11%')

### Technical comment:

10. Line 79, remove the extra ')'.

11. Line 152, please unify the use of 'IONO' or 'INO<sub>2</sub>' and 'IONO2' or 'INO<sub>3</sub>'.

12. Line 165, 'Cl\*' was defined in line 156.

13. Line 176, 'global zonal mean' should be 'global mean'?

14. Line 271, '4.2' should be '4.3'.

15. Fig 12, NO<sub>x</sub> is not an oxidant. Also, the color scale should be improved for OH and NO<sub>x</sub>.

### Reference:

Fu, X., Wang, T., Wang, S., Zhang, L., Cai, S., Xing, J. and Hao, J., 2018. Anthropogenic emissions of hydrogen chloride and fine particulate chloride in China. *Environmental science & technology*, 52(3), pp.1644-1654.

Gunthe, S.S., Liu, P., Panda, U., Raj, S.S., Sharma, A., Darbyshire, E., Reyes-Villegas, E., Allan, J., Chen, Y., Wang, X. and Song, S., 2021. Enhanced aerosol particle growth sustained by high continental chlorine emission in India. *Nature Geoscience*, 14(2), pp.77-84.

Hossaini, R., Chipperfield, M.P., Saiz- Lopez, A., Fernandez, R., Monks, S., Feng, W., Brauer, P. and Von Glasow, R., 2016. A global model of tropospheric chlorine chemistry: Organic versus inorganic sources and impact on methane oxidation. *Journal of Geophysical Research: Atmospheres*, 121(23), pp.14-271.

Lee, B.H., Lopez- Hilfiker, F.D., Schroder, J.C., Campuzano- Jost, P., Jimenez, J.L., McDuffie, E.E., Fibiger, D.L., Veres, P.R., Brown, S.S., Campos, T.L. and Weinheimer, A.J., 2018. Airborne observations of reactive inorganic chlorine and bromine species in the exhaust of coal- fired power plants. *Journal of Geophysical Research: Atmospheres*, 123(19), pp.11-225.

Li, Q., Zhang, L., Wang, T., Tham, Y.J., Ahmadov, R., Xue, L., Zhang, Q. and Zheng, J., 2016. Impacts of heterogeneous uptake of dinitrogen pentoxide and chlorine activation on ozone and reactive nitrogen partitioning: improvement and application of the WRF-Chem model in southern China. *Atmospheric Chemistry and Physics*, 16(23), pp.14875-14890.

Li, Q., Badia, A., Wang, T., Sarwar, G., Fu, X., Zhang, L., Zhang, Q., Fung, J., Cuevas, C.A., Wang, S. and Zhou, B., 2020. Potential effect of halogens on atmospheric oxidation and air quality in china. *Journal of Geophysical Research: Atmospheres*, 125(9), p.e2019JD032058.

Liu, Y., Fan, Q., Chen, X., Zhao, J., Ling, Z., Hong, Y., Li, W., Chen, X., Wang, M. and Wei, X., 2018. Modeling the impact of chlorine emissions from coal combustion and prescribed waste incineration on tropospheric ozone formation in China. *Atmospheric Chemistry and Physics*, 18(4), pp.2709-2724.

Peng, X., Wang, W., Xia, M., Chen, H., Ravishankara, A.R., Li, Q., Saiz-Lopez, A., Liu, P., Zhang, F., Zhang, C. and Xue, L., 2020. An unexpected large continental source of reactive bromine and chlorine with significant impact on wintertime air quality. *National Science Review*.

- Qiu, X., Ying, Q., Wang, S., Duan, L., Zhao, J., Xing, J., Ding, D., Sun, Y., Liu, B., Shi, A. and Yan, X., 2019. Modeling the impact of heterogeneous reactions of chlorine on summertime nitrate formation in Beijing, China. *Atmospheric Chemistry and Physics*, 19(10), pp.6737-6747.
- Sherwen, T., Schmidt, J.A., Evans, M.J., Carpenter, L.J., Großmann, K., Eastham, S.D., Jacob, D.J., Dix, B., Koenig, T.K., Sinreich, R. and Ortega, I., 2016. Global impacts of tropospheric halogens (Cl, Br, I) on oxidants and composition in GEOS-Chem. *Atmospheric Chemistry and Physics*, 16(18), pp.12239-12271.
- Tham, Y.J., Wang, Z., Li, Q., Yun, H., Wang, W., Wang, X., Xue, L., Lu, K., Ma, N., Bohn, B. and Li, X., 2016. Significant concentrations of nitryl chloride sustained in the morning: investigations of the causes and impacts on ozone production in a polluted region of northern China. *Atmospheric chemistry and physics*, 16(23), pp.14959-14977.
- Thornton, J.A., Kercher, J.P., Riedel, T.P., Wagner, N.L., Cozic, J., Holloway, J.S., Dubé, W.P., Wolfe, G.M., Quinn, P.K., Middlebrook, A.M. and Alexander, B., 2010. A large atomic chlorine source inferred from mid-continental reactive nitrogen chemistry. *Nature*, 464(7286), pp.271-274.
- Wang, T., Tham, Y.J., Xue, L., Li, Q., Zha, Q., Wang, Z., Poon, S.C., Dubé, W.P., Blake, D.R., Louie, P.K. and Luk, C.W., 2016. Observations of nitryl chloride and modeling its source and effect on ozone in the planetary boundary layer of southern China. *Journal of Geophysical Research: Atmospheres*, 121(5), pp.2476-2489.
- Wang, X., Jacob, D.J., Eastham, S.D., Sulprizio, M.P., Zhu, L., Chen, Q., Alexander, B., Sherwen, T., Evans, M.J., Lee, B.H. and Haskins, J.D., 2019. The role of chlorine in global tropospheric chemistry. *Atmospheric Chemistry and Physics*, 19(6), pp.3981-4003.
- Wang, X., Jacob, D.J., Fu, X., Wang, T., Breton, M.L., Hallquist, M., Liu, Z., McDuffie, E.E. and Liao, H., 2020. Effects of Anthropogenic Chlorine on PM<sub>2.5</sub> and Ozone Air Quality in China. *Environmental Science & Technology*, 54(16), pp.9908-9916.
- Yun, H., Wang, W., Wang, T., Xia, M., Yu, C., Wang, Z., Poon, S.C., Yue, D. and Zhou, Y., 2018. Nitrate formation from heterogeneous uptake of dinitrogen pentoxide during a severe winter haze in southern China. *Atmospheric Chemistry and Physics*, 18(23), pp.17515-17527.
- Zhou, W., Zhao, J., Ouyang, B., Mehra, A., Xu, W., Wang, Y., Bannan, T.J., Worrall, S.D., Priestley, M., Bacak, A. and Chen, Q., 2018. Production of N<sub>2</sub>O<sub>5</sub> and ClNO<sub>2</sub> in summer in urban Beijing, China. *Atmospheric Chemistry and Physics*, 18(16), pp.11581-11597.
- Zhu, L., Jacob, D.J., Eastham, S.D., Sulprizio, M.P., Wang, X., Sherwen, T., Evans, M.J., Chen, Q., Alexander, B., Koenig, T.K. and Volkamer, R., 2019. Effect of sea salt aerosol on tropospheric bromine chemistry. *Atmospheric Chemistry and Physics*, 19(9), pp.6497-6507.
